# Supplementary material for: The Ecology of Management Concepts
Source: Atypon-hosted journal article supplement (doi:10.1287/stsc.2020.0108), 2020-10-07
Supplement: stsc.2020.0108.sm1.pdf [file stsc.2020.0108.sm1.pdf]

## Appendix to Denrell and Kovacs (2020): “The Ecology of Management Concepts”

Table A1: Results with 5-year periods collapsed

|                                                          | Poisson models<br>Keyword FE |                      |                      | NBReg models<br>Keyword RE, Year FE |                      |                      |
|----------------------------------------------------------|------------------------------|----------------------|----------------------|-------------------------------------|----------------------|----------------------|
|                                                          | M1                           | M2                   | M3                   | M4                                  | M5                   | M6                   |
| Keyword age                                              | -0.006***<br>[0.000]         | -0.013***<br>[0.000] | -0.002***<br>[0.000] | -0.013***<br>[0.000]                | -0.017***<br>[0.000] | -0.012***<br>[0.000] |
| Keyword popularity in t-1                                | 0.337***<br>[0.005]          | 0.405***<br>[0.005]  | 0.431***<br>[0.005]  | 0.438***<br>[0.008]                 | 0.450***<br>[0.008]  | 0.536***<br>[0.008]  |
| Change in popularity from t-2 to t-1                     | 0.003***<br>[0.000]          | 0.003***<br>[0.000]  | 0.001***<br>[0.000]  | 0.002**<br>[0.001]                  | 0.006***<br>[0.000]  | 0.002***<br>[0.000]  |
| Affiliation with popular others                          | 0.243***<br>[0.002]          |                      |                      | 0.467***<br>[0.005]                 |                      |                      |
| Popularity in t-1 X Affiliation with popular others      | -0.044***<br>[0.000]         |                      |                      | -0.109***<br>[0.001]                |                      |                      |
| Local crowding                                           |                              | 0.334***<br>[0.002]  |                      |                                     | 0.405***<br>[0.003]  |                      |
| Popularity in t-1 X Local crowding                       |                              | -0.053***<br>[0.000] |                      |                                     | -0.072***<br>[0.001] |                      |
| Combination with similar concepts                        |                              |                      | 0.109***<br>[0.002]  |                                     |                      | 0.084***<br>[0.001]  |
| Popularity in t-1 X<br>Combination with similar concepts |                              |                      | -0.013***<br>[0.000] |                                     |                      | -0.012***<br>[0.000] |
| Constant                                                 |                              |                      |                      | 0.112***<br>[0.016]                 | 0.229***<br>[0.017]  | -0.057***<br>[0.015] |
| Observations                                             | 137,132                      | 137,132              | 137,132              | 151,757                             | 151,757              | 151,757              |
| Log-likelihood                                           | -89,869                      | -83,433              | -94,959              | -116,637                            | -112,380             | -119,138             |

Standard errors in parentheses

\*\*\* p<0.01, \*\* p<0.05, \* p<0.1

Table A2: Truncating keyword trajectories 10 years after last mention

|                                                          | Poisson models<br>Keyword FE |                      |                      | NBReg models<br>Keyword RE, Year FE |                      |                      |
|----------------------------------------------------------|------------------------------|----------------------|----------------------|-------------------------------------|----------------------|----------------------|
|                                                          | M1                           | M2                   | M3                   | M4                                  | M5                   | M6                   |
| Keyword age                                              | 0.006***<br>[0.000]          | -0.009***<br>[0.000] | 0.005***<br>[0.000]  | 0.005***<br>[0.000]                 | -0.007***<br>[0.000] | 0.005***<br>[0.000]  |
| Keyword popularity in t-1                                | 0.589***<br>[0.007]          | 0.762***<br>[0.006]  | 0.641***<br>[0.005]  | 0.675***<br>[0.010]                 | 0.766***<br>[0.008]  | 0.690***<br>[0.007]  |
| Change in popularity from t-2 to t-1                     | -0.007***<br>[0.000]         | 0.006***<br>[0.000]  | -0.005***<br>[0.000] | -0.016***<br>[0.001]                | 0.015***<br>[0.001]  | -0.012***<br>[0.001] |
| Affiliation with popular others                          | 0.022***<br>[0.002]          |                      |                      | 0.002<br>[0.004]                    |                      |                      |
| Popularity in t-1 X Affiliation with popular others      | -0.005***<br>[0.000]         |                      |                      | 0.000<br>[0.001]                    |                      |                      |
| Local crowding                                           |                              | 0.278***<br>[0.001]  |                      |                                     | 0.325***<br>[0.001]  |                      |
| Popularity in t-1 X Local crowding                       |                              | -0.064***<br>[0.000] |                      |                                     | -0.077***<br>[0.000] |                      |
| Combination with similar concepts                        |                              |                      | 0.106***<br>[0.001]  |                                     |                      | 0.098***<br>[0.001]  |
| Popularity in t-1 X<br>Combination with similar concepts |                              |                      | -0.022***<br>[0.000] |                                     |                      | -0.022***<br>[0.000] |
| Constant                                                 |                              |                      |                      | 0.457***<br>[0.040]                 | 0.445***<br>[0.041]  | 0.594***<br>[0.040]  |
| Observations                                             | 363,316                      | 363,316              | 363,316              | 364,885                             | 364,885              | 364,885              |
| Log-likelihood                                           | -179,379                     | -151,172             | -170,717             | -202,556                            | -177,819             | -196,914             |

Standard errors in parentheses

\*\*\* p<0.01, \*\* p<0.05, \* p<0.1

Table A3: Re-estimating the models using the subset of keywords with less than 1000 total mentions

|                                                       | Poisson models<br>Keyword FE |                      |                      | NBReg models<br>Keyword RE, Year FE |                      |                      |
|-------------------------------------------------------|------------------------------|----------------------|----------------------|-------------------------------------|----------------------|----------------------|
|                                                       | M1                           | M2                   | M3                   | M4                                  | M5                   | M6                   |
| Keyword age                                           | -0.000***<br>[0.000]         | -0.016***<br>[0.000] | -0.002***<br>[0.000] | -0.007***<br>[0.000]                | -0.019***<br>[0.000] | -0.006***<br>[0.000] |
| Keyword popularity in t-1                             | 0.642***<br>[0.009]          | 0.772***<br>[0.007]  | 0.776***<br>[0.006]  | 0.799***<br>[0.013]                 | 0.836***<br>[0.009]  | 0.901***<br>[0.008]  |
| Change in popularity from t-2 to t-1                  | -0.027***<br>[0.001]         | 0.033***<br>[0.001]  | -0.020***<br>[0.001] | -0.041***<br>[0.001]                | 0.050***<br>[0.001]  | -0.035***<br>[0.001] |
| Affiliation with popular others                       | 0.047***<br>[0.003]          |                      |                      | 0.042***<br>[0.006]                 |                      |                      |
| Popularity in t-1 X Affiliation with popular others   | -0.010***<br>[0.001]         |                      |                      | -0.010***<br>[0.002]                |                      |                      |
| Local crowding                                        |                              | 0.345***<br>[0.001]  |                      |                                     | 0.431***<br>[0.002]  |                      |
| Popularity in t-1 Local crowding                      |                              | -0.086***<br>[0.001] |                      |                                     | -0.106***<br>[0.001] |                      |
| Combination with similar concepts                     |                              |                      | 0.168***<br>[0.001]  |                                     |                      | 0.159***<br>[0.001]  |
| Popularity in t-1 X Combination with similar concepts |                              |                      | -0.043***<br>[0.001] |                                     |                      | -0.044***<br>[0.001] |
| Observations                                          | 664,376                      | 664,376              | 664,376              | 674,773                             | 674,773              | 674,773              |
| Log-likelihood                                        | -190,481                     | -155,965             | -179,607             | -219,807                            | -187,640             | -211,845             |

Standard errors in parentheses

\*\*\* p<0.01, \*\* p<0.05, \* p<0.1

Table A4: Controlling for the productivity of the article authors

|                                                       | Poisson models<br>Keyword FE |                      |                      | NBReg models<br>Keyword RE, Year FE |                      |                      |
|-------------------------------------------------------|------------------------------|----------------------|----------------------|-------------------------------------|----------------------|----------------------|
|                                                       | M1                           | M2                   | M3                   | M4                                  | M5                   | M6                   |
| Keyword age                                           | -0.003***<br>[0.000]         | -0.013***<br>[0.000] | -0.004***<br>[0.000] | -0.006***<br>[0.000]                | -0.016***<br>[0.000] | -0.007***<br>[0.000] |
| Keyword popularity in t-1                             | 0.956***<br>[0.007]          | 1.055***<br>[0.007]  | 0.940***<br>[0.005]  | 1.054***<br>[0.008]                 | 1.159***<br>[0.009]  | 1.035***<br>[0.006]  |
| Change in popularity from t-2 to t-1                  | -0.010***<br>[0.001]         | 0.018***<br>[0.001]  | -0.011***<br>[0.001] | -0.015***<br>[0.001]                | 0.016***<br>[0.001]  | -0.014***<br>[0.001] |
| Affiliation with popular others                       | 0.031***<br>[0.002]          |                      |                      | 0.036***<br>[0.003]                 |                      |                      |
| Popularity in t-1 X Affiliation with popular others   | -0.010***<br>[0.001]         |                      |                      | -0.012***<br>[0.001]                |                      |                      |
| Local crowding                                        |                              | 0.285***<br>[0.001]  |                      |                                     | 0.323***<br>[0.001]  |                      |
| Popularity in t-1 X Local crowding                    |                              | -0.077***<br>[0.000] |                      |                                     | -0.095***<br>[0.001] |                      |
| Combination with similar concepts                     |                              |                      | 0.050***<br>[0.000]  |                                     |                      | 0.052***<br>[0.000]  |
| Popularity in t-1 X Combination with similar concepts |                              |                      | -0.014***<br>[0.000] |                                     |                      | -0.015***<br>[0.000] |
| Author productivity                                   | 0.462***<br>[0.003]          | 0.268***<br>[0.003]  | 0.456***<br>[0.002]  | 0.400***<br>[0.003]                 | 0.227***<br>[0.003]  | 0.398***<br>[0.003]  |
| Constant                                              |                              |                      |                      | 0.283<br>[0.205]                    | 2.126***<br>[0.715]  | 0.447**<br>[0.225]   |
| Observations                                          | 615,596                      | 615,596              | 615,596              | 615,596                             | 615,596              | 615,596              |
| Log-likelihood                                        | -231,306                     | -197,443             | -226,728             | -218,643                            | -191,544             | -215,573             |

Standard errors in brackets

\*\*\* p<0.01, \*\* p<0.05, \* p<0.1

Table A5: Models using an alternative measure for “Affiliation with popular others”: Max popularity of co-mentioned keywords in year t-1.

|                                                            | Poisson model<br>Keyword FE | NBReg model<br>Keyword RE, Year<br>FE |
|------------------------------------------------------------|-----------------------------|---------------------------------------|
| Keyword age                                                | 0.009***<br>[0.000]         | 0.002***<br>[0.000]                   |
| Keyword popularity in t-1                                  | 1.763***<br>[0.004]         | 1.716***<br>[0.006]                   |
| Change in popularity from t-2 to t-1                       | -0.031***<br>[0.001]        | -0.032***<br>[0.001]                  |
| Max pop. of co-mentioned keywords (t-1)                    | 0.132***<br>[0.002]         | 0.094***<br>[0.002]                   |
| Popularity in t-1 X<br>(max pop. of co-mentioned keywords) | -0.053***<br>[0.001]        | -0.034***<br>[0.001]                  |
| Constant                                                   |                             | -14.549<br>[2,023.656]                |
| Observations                                               | 676,719                     | 676,720                               |
| Log-likelihood                                             | -265,553                    | -244,162                              |

Standard errors in brackets

\*\*\* p<0.01, \*\* p<0.05, \* p<0.1

Table A6: Re-estimating the models with log-linear specification. OLS models with keyword fixed effects, the DV is  $\ln(\text{count}+1)$ .

|                                                       | M1                   | M2                   | M3                   | M4                   |
|-------------------------------------------------------|----------------------|----------------------|----------------------|----------------------|
| Keyword age                                           | -0.000***<br>[0.000] | -0.000***<br>[0.000] | -0.001***<br>[0.000] | 0.000***<br>[0.000]  |
| Keyword popularity in t-1                             | 0.253***<br>[0.001]  | 0.118***<br>[0.002]  | 0.045***<br>[0.001]  | 0.223***<br>[0.001]  |
| Change in popularity from t-2 to t-1                  | -0.023***<br>[0.000] | -0.032***<br>[0.000] | 0.017***<br>[0.000]  | -0.019***<br>[0.000] |
| Affiliation with popular others                       |                      | 0.067***<br>[0.001]  |                      |                      |
| Popularity in t-1 X Affiliation with popular others   |                      | -0.009***<br>[0.000] |                      |                      |
| Local crowding                                        |                      |                      | 0.245***<br>[0.000]  |                      |
| Popularity in t-1 X Local crowding                    |                      |                      | -0.048***<br>[0.000] |                      |
| Combination with similar concepts                     |                      |                      |                      | 0.105***<br>[0.000]  |
| Popularity in t-1 X Combination with similar concepts |                      |                      |                      | -0.021***<br>[0.000] |
| Constant                                              | 0.066***<br>[0.001]  | 0.079***<br>[0.001]  | 0.079***<br>[0.000]  | 0.057***<br>[0.000]  |
| Observations                                          | 676,720              | 676,720              | 676,720              | 676,720              |
| R-squared                                             | 0.051                | 0.076                | 0.656                | 0.229                |

Standard errors in brackets

\*\*\*  $p < 0.01$ , \*\*  $p < 0.05$ , \*  $p < 0.1$

Table A7: Re-estimating the models of Table 3 with a split-sample approach.

(a) Poisson models with keyword fixed effects

|                                      | M1                                    | M2                                 | M3                                    | M4                                 | M5                                    | M6                                 |
|--------------------------------------|---------------------------------------|------------------------------------|---------------------------------------|------------------------------------|---------------------------------------|------------------------------------|
| Sample                               | $\ln(\text{popularity}_{t-1}) \leq 1$ | $\ln(\text{popularity}_{t-1}) > 1$ | $\ln(\text{popularity}_{t-1}) \leq 1$ | $\ln(\text{popularity}_{t-1}) > 1$ | $\ln(\text{popularity}_{t-1}) \leq 1$ | $\ln(\text{popularity}_{t-1}) > 1$ |
| Affiliation with popular others      | 0.259***<br>[0.005]                   | 0.014***<br>[0.000]                |                                       |                                    |                                       |                                    |
| Local crowding                       |                                       |                                    | 0.625***<br>[0.002]                   | 0.069***<br>[0.001]                |                                       |                                    |
| Combination with similar concepts    |                                       |                                    |                                       |                                    | 0.380***<br>[0.003]                   | 0.016***<br>[0.000]                |
| Keyword age                          | -0.006***<br>[0.000]                  | 0.010***<br>[0.000]                | -0.028***<br>[0.000]                  | -0.001***<br>[0.000]               | -0.008***<br>[0.000]                  | 0.013***<br>[0.000]                |
| Change in popularity from t-2 to t-1 | -0.113***<br>[0.003]                  | -0.001<br>[0.001]                  | 0.103***<br>[0.004]                   | 0.002***<br>[0.001]                | -0.064***<br>[0.004]                  | 0.008***<br>[0.001]                |
| Observations                         | 651,974                               | 15,585                             | 651,974                               | 15,585                             | 651,974                               | 15,585                             |
| Log-likelihood                       | -157755                               | -31629                             | -115802                               | -27668                             | -144249                               | -31024                             |

(b) Negative binomial models with keyword random effects and year fixed effects

|                                      | M7                                    | M8                                 | M9                                    | M10                                | M11                                   | M12                                |
|--------------------------------------|---------------------------------------|------------------------------------|---------------------------------------|------------------------------------|---------------------------------------|------------------------------------|
|                                      | $\ln(\text{popularity}_{t-1}) \leq 1$ | $\ln(\text{popularity}_{t-1}) > 1$ | $\ln(\text{popularity}_{t-1}) \leq 1$ | $\ln(\text{popularity}_{t-1}) > 1$ | $\ln(\text{popularity}_{t-1}) \leq 1$ | $\ln(\text{popularity}_{t-1}) > 1$ |
| Affiliation with popular others      | 0.286***<br>[0.005]                   | 0.016***<br>[0.001]                |                                       |                                    |                                       |                                    |
| Local crowding                       |                                       |                                    | 0.629***<br>[0.002]                   | 0.073***<br>[0.001]                |                                       |                                    |
| Combination with similar concepts    |                                       |                                    |                                       |                                    | 0.271<br>[0.000]                      | 0.015***<br>[0.000]                |
| Keyword age                          | -0.013***<br>[0.000]                  | 0.010***<br>[0.000]                | -0.027***<br>[0.000]                  | 0.001**<br>[0.000]                 | -0.012***<br>[0.000]                  | 0.012***<br>[0.000]                |
| Change in popularity from t-2 to t-1 | -0.149***<br>[0.004]                  | -0.007***<br>[0.001]               | 0.107***<br>[0.004]                   | 0.001<br>[0.001]                   | -0.112***<br>[0.004]                  | 0.003**<br>[0.002]                 |
| Constant                             | -0.032**<br>[0.016]                   | 0.183***<br>[0.029]                | 1.555***<br>[0.062]                   | 0.515***<br>[0.032]                | 0.170***<br>[0.019]                   | 0.182***<br>[0.029]                |
| Observations                         | 662,397                               | 17,701                             | 662,397                               | 17,701                             | 662,397                               | 17,701                             |
| Log-likelihood                       | -191333                               | -33121                             | -151258                               | -30974                             | -181414                               | -33018                             |

Standard errors in brackets

\*\*\* p<0.01, \*\* p<0.05, \* p<0.1
